# Supplementary material for: Facile and rapid synthesis of water-soluble fluorescent gold nanoclusters for sensitive and selective detection of Ag+
Source: Royal Society of Chemistry journal article supplement (doi:10.1039/c2tc00207h), 2012-11-20
Supplement: c2tc00207h.pdf [file c2tc00207h.pdf]

## Electronic Supplementary Information (ESI)

# Facile and Rapid Synthesis of Water-Soluble Fluorescent Gold Nanoclusters for Sensitive and Selective Detection of Ag<sup>+</sup>

Jian Sun,<sup>a</sup> Yuan Yue,<sup>b</sup> Ping Wang,<sup>a</sup> Haili He,<sup>a,c</sup> and Yongdong Jin\*<sup>a</sup>

<sup>a</sup>*State Key Laboratory of Electroanalytical Chemistry, Changchun Institute of Applied Chemistry, Chinese Academy of Sciences, Changchun 130022, Jilin, China. Phone/fax: +86-431-85262661. E-mail: [ydjin@ciac.jl.cn](mailto:yjjin@ciac.jl.cn)*

<sup>b</sup>*State Key Laboratory of Supramolecular Structure and Materials, Jilin University, No. 2699 Qianjin Street, Changchun 130012, Jilin, China.*

<sup>c</sup>*University of the Chinese Academy of Sciences, Beijing 100039, China.*

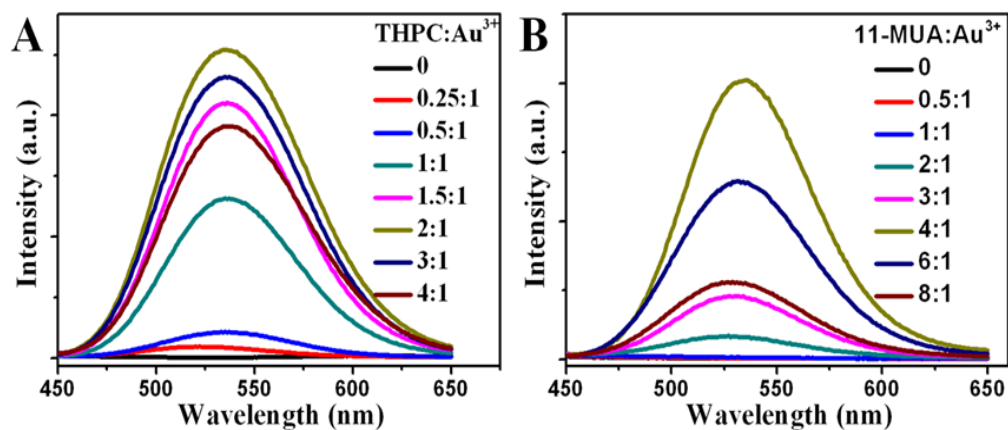

**Fig. S1** Fluorescence emission (excitation at 375 nm) of AuNCs synthesized from (A) different ratios of THPC to  $\text{Au}^{3+}$ , and (B) different ratios of 11-MUA to  $\text{Au}^{3+}$ .

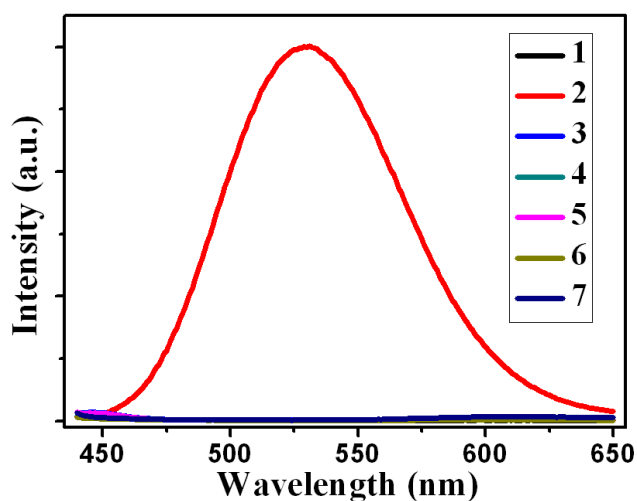

**Fig. S2** Fluorescence emission (excitation at 375 nm) for the AuNCs synthesized by (1)  $\text{NaBH}_4$ , (2) THPC, (3) ascorbic acid, (4)  $\text{N}_2\text{H}_4 \cdot \text{H}_2\text{O}$ , (5)  $\text{NH}_2\text{OH}$ , (6) citrate sodium, (7) no additional reducing agent, respectively.

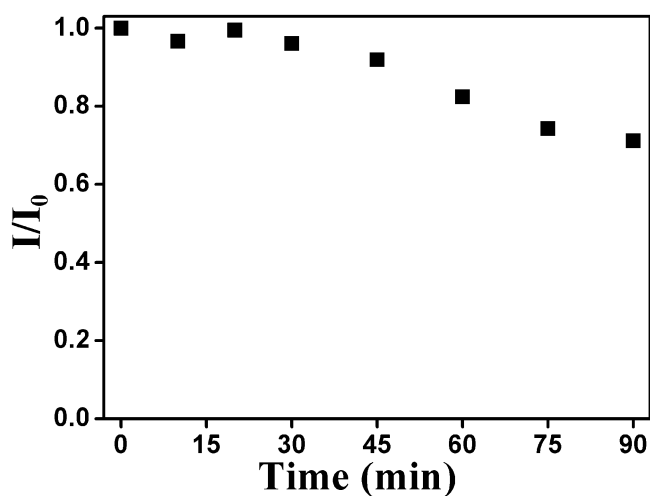

**Fig. S3** Photostability of the MUA/THPC-AuNCs system measured with the relative fluorescence intensity at 535 nm (excitation at 375 nm) of the AuNCs in water as a function of the UV irradiation time (365 nm).

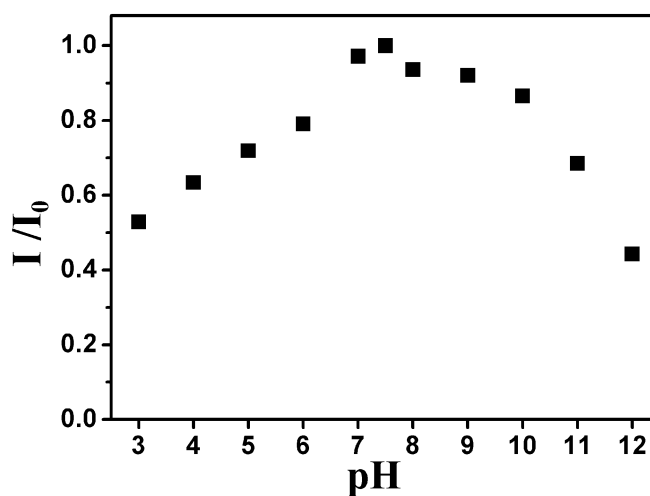

**Fig. S4** The relative fluorescence intensity at 535 nm (excitation at 375 nm) of the MUA/THPC-AuNCs in the HEPES buffer at different pHs from 3 to 12.

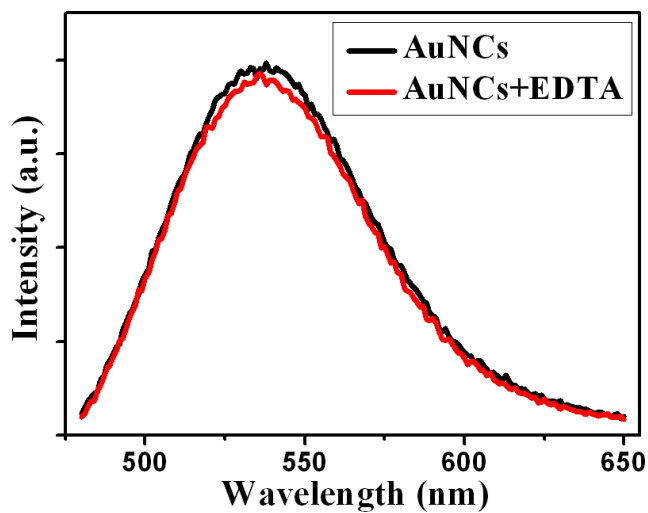

**Fig. S5** Fluorescence emission spectra (excitation at 375 nm) of the MUA/THPC-AuNCs in the absence (black) and presence (red) of 500  $\mu\text{M}$  EDTA in 20 mM HEPES buffer at pH 7.5.

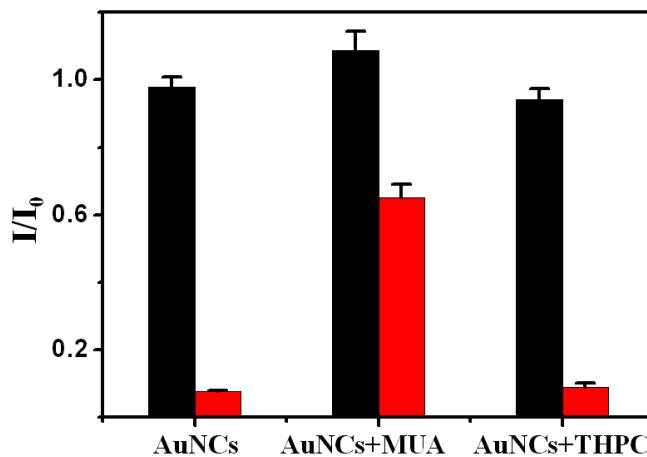

**Fig. S6** The relative fluorescence intensity at 535 nm (excitation at 375 nm) for the MUA/THPC-AuNCs; AuNCs with added 20  $\mu\text{M}$  11-MUA; and AuNCs with added 20  $\mu\text{M}$  THPC measured in the absence (black) and presence (red) of 10  $\mu\text{M}$   $\text{Ag}^+$  ions in 20 mM HEPES buffer at pH 7.5.
